# Supplementary material
Source: HighWire-hosted journal article supplement (http://thorax.bmjjournals.com/highwire/filestream/174010/field_highwire_adjunct_files/0/62121050webonlyapp.pdf)
Supplement: 62121050webonlyapp.pdf [file 62121050webonlyapp.pdf]

**Microsomal Epoxide Hydrolase, Glutathione S-transferase P1, Traffic and Childhood**

**Asthma**

Muhammad T. Salam, Pi-Chu Lin, Edward L. Avol, W. James Gauderman,

Frank D. Gilliland

**SUPPLEMENTARY MATERIAL (ONLINE ONLY MATERIAL)**

## **METHODS**

### ***Study design and subjects***

Children of this study participated in the CHS, which has been described previously.[1, 2] In brief, a total of 6,259 children attending public school in 12 southern California communities were recruited in two cohorts in 1993 and 1996 for the CHS. Mean age at enrollment was 12.1 years (standard deviation (SD) 2.4 years) for cohorts recruited in 1993 and was 9.6 years (SD, 0.4 years) for cohort recruited in 1996. Beginning in 1998, we started collecting buccal samples and by May 2006, we collected and genotyped samples from 3,824 (61.1%) of children. Parents provided informed consent for participants below 18 years of age whereas participants over 18 years of age gave their informed consent. Children who were African-American ( $n = 162$ ), Asian ( $n = 166$ ) or belonged mixed race/ethnicity ( $n = 192$ ) were excluded from the analysis due to insufficient sample sizes for stratified analyses and concern for population stratification. We also excluded 28 children for whom we did not have race/ethnicity information. Sixty-two children with unknown asthma status were also excluded.

Of the 3,214 non-Hispanic and Hispanic white children with available buccal samples, we were unable to obtain genotype results for the two SNPs in the *EPHX1* gene for 90 (2.8%) children. Therefore, our final sample included 3,124 children who were either Hispanic ( $n = 940$ ) or non-Hispanic ( $n = 2,124$ ) white with known asthma status. The University of Southern California Institutional Review Board approved the study.

### ***Buccal Cell Collection and Processing***

Children were provided with two toothbrushes and instructed to brush their teeth with the first one. They were instructed to gently brush the buccal mucosa with the second toothbrush. The

brush was then placed in a leak proof container that was filled with an alcohol-based fixative.

Children then swished liquid throughout their mouths and expelled the fluid into a container. The majority of buccal cell specimens were collected at school under the supervision of study staff.

The remaining specimens were collected at home and sent to us by mail.

Buccal cell suspensions were centrifuged at 2,000g on the day they were received in the laboratory. The pellets were stored frozen at  $-20^{\circ}\text{C}$  until used for DNA extraction, at which time they were resuspended and incubated in 600  $\mu\text{l}$  of lysis solution from a PUREGENE DNA isolation kit (cat #D-5000; GENTRA, Minneapolis, MN) containing 100  $\mu\text{g}/\text{ml}$  proteinase K overnight at  $55^{\circ}\text{C}$ . DNA extraction was performed according to manufacturer's recommendations. The DNA samples were resuspended in aqueous solution and stored at  $-20^{\circ}\text{C}$ .

### ***Genotyping***

***EPHX1***: Genomic DNA was extracted from buccal mucosal cells using PUREGENE<sup>TM</sup> DNA purification kit (Gentra Systems, Minneapolis, MN). The genotyping for the exon 3 113Tyr $\rightarrow$ 113His polymorphic site (T $\rightarrow$ C) of EPHX1 and the exon 4 139His $\rightarrow$ 139Arg (A $\rightarrow$ G) polymorphic site of EPHX1 was performed using the TaqMan Allelic Discrimination (AD) assay (Applied Biosystems, Foster City, CA). The primers and probes used for these two polymorphisms are presented in TABLE E1. The Taqman genotyping reaction was amplified on a GeneAmp PCR system 9600 ( $50^{\circ}\text{C}$  for 2 min,  $95^{\circ}\text{C}$  for 10 min, followed by 40 cycles of  $92^{\circ}\text{C}$  for 15 s and  $60^{\circ}\text{C}$  for 1 min), and fluorescence was detected on an ABI PRISM<sup>TM</sup> 7700 Sequence Detector (Applied Biosystems). In each run 10% of the samples were randomly selected and used for quality control. The results from TaqMan AD assay for exon 3 polymorphic site (T $\rightarrow$ C)

and the exon 4 (A→G) polymorphic site of EPHX1 were validated using PCR amplification of specific alleles (PASA) method and PCR/RFLP method,[3, 4] respectively.

### ***GSTM1, GSTP1, GSTT1:***

GSTM1, GSTT1 and GSTP1 genotypes were determined using real-time PCR using a TaqMan 7700 (Applied Biosystems, Foster City, CA). The forward and reverse primers and probes for GSTM1, GSTT1, and GSTP1 Ile105Val are presented in TABLE E1. The presence or absence of a fluorescent amplification signal was used as an indication of whether the GSTM1 and GSTT1 alleles were present or absent in a particular genomic DNA sample. Samples showing no signal or late cycle number for start of amplification were repeated and further analyzed with primers and probes for the actin gene to verify the presence of amplifiable DNA. The denaturation step during the first cycle was 10 minutes at 95°C. For the remainder of the amplification reaction, we used a two-cycle protocol characterized by 15-second incubation at 95°C followed by 1-minute incubation at 60°C.

Analysis of the single nucleotide polymorphism at codon 105 in the GSTP1 gene was performed using allele-specific probes. The fact that the wavelength of the fluorescent label was different in the two probes allowed distinguishing between amplification products from each allele in a single reaction. The conditions for the PCR were similar to those used for GSTT1 and GSTM1 polymorphisms. Samples showing no signal or late cycle number for start of amplification for either one of these alleles were repeated and further analyzed with primers and probes for the actin gene to verify the presence of amplifiable DNA.

### ***Determining EPHX1 phenotypes***

We determined the EPHX1 phenotypes based on methods described by Benhamou et al (TABLE E2).[5]

TABLE E1. Forward and reverse primers and probes for GSTM1, GSTT1, and GSTP1

Ile105Val genotypes

| Genes                   | Primers                                                                                                                                                                                                  |
|-------------------------|----------------------------------------------------------------------------------------------------------------------------------------------------------------------------------------------------------|
| EPHX1 Tyr113His (T113C) | Forward: 5'-TGGAAGAAGCAGGTGGAGATTC-3'<br>Reverse: 5'-TGCAAACATACCTTCAATCTTAGTCTTG-3'<br>MGB Probes:<br>T allele: 5'-(6FAM)CAACAGAT <u>A</u> CCCTCACT-3'<br>C allele: 5'-(VIC)CAACAGAC <u>A</u> CCCTCA-3' |
| EPHX1 His139Arg (A139G) | Forward: 5'-ACATCCACTTCATCCACGTGA-3'<br>Reverse: 5'-TAAAACTCGTAGAAAGAGCCGG-3'<br>MGB Probes:<br>A allele: 5'-(6FAM)AGGCC <u>A</u> TACCCCGAAG-3'<br>G allele: 5'-(VIC)AGGCC <u>G</u> TACCCCGAA-3'         |
| GSTM1 (null/present)    | Forward: 5'-CTTGGAGGAACTCCCTGAAAAG-3'<br>Reverse: 5'-TGGAACCTCCATAACACGTGA-3'<br>Probe: 5'-(6FAM)AAGCGGCCATGGTTTGCAGG-3'                                                                                 |
| GSTT1 null/present)     | Forward: 5'-GTGCAAACACCTCCTGGAGAT-3'<br>Reverse: 5'-AGTCCTTGGCCTTCAGAATGA-3'<br>Probe: 5'-(6FAM)ATGCTGCCCATCCCTGCC(TAMRA)-3'                                                                             |
| GSTP1 (Ile105Val)       | Forward: 5'-CCTGGTGGACATGGTGAATG-3'<br>Reverse: 5'-TGCTCACATAGTTGGTGTAGATGA-3'<br><br>MGB Probes:<br>A allele: 5'-(6FAM)TGCAAATAC <u>A</u> TCTCCCT-3'<br>G allele: 5'-(VIC)CTGCAAATAC <u>G</u> TCTCC-3'  |

TABLE E2. Determination of EPHX1 phenotypes

| <i>EPHX1 His139Arg</i>                      | <i>EPHX1 Tyr113His</i> |                |                |
|---------------------------------------------|------------------------|----------------|----------------|
|                                             | <i>Tyr/Tyr</i>         | <i>Tyr/His</i> | <i>His/His</i> |
| Classification based on Benhamou et al (E6) |                        |                |                |
| <i>His/His</i>                              | Intermediate           | Low            | Low            |
| <i>His/Arg</i>                              | High                   | Intermediate   | Low            |
| <i>Arg/Arg</i>                              | High                   | High           | Intermediate   |

TABLE E3. Detectable ORs for different asthma outcomes for the main effects of EPHX1 and GSTP1 functional variant and EPHX1 phenotype

|                              | OR detected with 80% power |
|------------------------------|----------------------------|
| EPHX1 Tyr113His              |                            |
| Ever asthma                  | 0.80                       |
| Current asthma               | 0.77                       |
| Early persistent             | 0.70                       |
| Late onset                   | 0.74                       |
| EPHX1 His139Arg              |                            |
| Ever asthma                  | 1.28                       |
| Current asthma               | 1.35                       |
| Early persistent             | 1.47                       |
| Late onset                   | 1.40                       |
| GSTP1 Ile105Val <sup>†</sup> |                            |
| Ever asthma                  | 1.23                       |
| Current asthma               | 1.28                       |
| Early persistent             | 1.37                       |
| Late onset                   | 1.32                       |
| EPHX1 high phenotype         |                            |
| Ever asthma                  | 1.40                       |
| Current asthma               | 1.52                       |
| Early persistent             | 1.69                       |
| Late onset                   | 1.58                       |



TABLE E4. Detectable ORs for the modifying effects of Ile105Val genotype and residential distance from a major road on EPHX1 high phenotype and lifetime asthma

| Interactions                                                                                    | OR detected with<br>80% power |
|-------------------------------------------------------------------------------------------------|-------------------------------|
| EPHX1 high phenotype x GSTP1 105 Val/Val genotype                                               | 1.62                          |
| EPHX1 high phenotype x Residential distance <75m from a major road                              | 2.30                          |
| EPHX1 high phenotype x GSTP1 105 Val/Val genotype x Residential distance <75m from a major road | 7.20                          |

TABLE E5. Allele and haplotype frequencies in children with no asthma

|                    | N    | Minor allele |           | P <sub>HWE</sub> * | Haplotype frequencies<br>T113C – A139G |      |      |      | D' <sup>†</sup> |
|--------------------|------|--------------|-----------|--------------------|----------------------------------------|------|------|------|-----------------|
|                    |      | Allele       | Frequency |                    | CA                                     | CG   | TA   | TG   |                 |
| Overall sample     |      |              |           |                    |                                        |      |      |      |                 |
| EPHX1 T113C        | 2648 | C            | 0.32      | 0.12               | 0.24                                   | 0.07 | 0.58 | 0.10 | 0.16            |
| EPHX1 A139G        | 2648 | G            | 0.17      | 0.18               |                                        |      |      |      |                 |
| GSTP1 A105G        | 2615 | G            | 0.37      | 0.52               |                                        |      |      |      |                 |
| Non-Hispanic white |      |              |           |                    |                                        |      |      |      |                 |
| EPHX1 T113C        | 1823 | C            | 0.30      | 0.19               | 0.22                                   | 0.08 | 0.58 | 0.12 | 0.16            |
| EPHX1 A139G        | 1823 | G            | 0.20      | 0.24               |                                        |      |      |      |                 |
| GSTP1 A105G        | 1801 | G            | 0.33      | 0.99               |                                        |      |      |      |                 |
| Hispanic white     |      |              |           |                    |                                        |      |      |      |                 |
| EPHX1 T113C        | 825  | C            | 0.35      | 0.60               | 0.29                                   | 0.06 | 0.58 | 0.07 | 0.19            |
| EPHX1 A139G        | 825  | G            | 0.12      | 0.75               |                                        |      |      |      |                 |
| GSTP1 A105G        | 814  | G            | 0.44      | 0.05               |                                        |      |      |      |                 |

\* P-values for Hardy-Weinberg equilibrium

<sup>†</sup> Lewontin's D', a measure of linkage disequilibrium.

TABLE E6. Associations between *GSTM1* and *GSTT1* polymorphisms and asthma phenotypes

|                | No asthma |     | Lifetime asthma     |     | Current asthma      |     | Early persistent asthma<br>(diagnosis by 3 years) |     | Late onset asthma<br>(diagnosis after 3 years) |  |
|----------------|-----------|-----|---------------------|-----|---------------------|-----|---------------------------------------------------|-----|------------------------------------------------|--|
|                | N         | N   | OR* (95% CI)        | N   | OR* (95% CI)        | N   | OR* (95% CI)                                      | N   | OR* (95% CI)                                   |  |
| <i>GSTM1</i>   |           |     |                     |     |                     |     |                                                   |     |                                                |  |
| <i>Present</i> | 1300      | 215 | 1.0                 | 148 |                     | 82  | 1.0                                               | 113 | 1.0                                            |  |
| <i>Null</i>    | 1226      | 240 | 1.21 (0.98 to 1.49) | 146 | 1.08 (0.83 to 1.39) | 86  | 1.15 (0.83 to 1.60)                               | 117 | 1.10 (0.83 to 1.45)                            |  |
| <i>GSTT1</i>   |           |     |                     |     |                     |     |                                                   |     |                                                |  |
| <i>Present</i> | 1992      | 363 | 1.0                 | 232 |                     | 133 | 1.0                                               | 181 | 1.0                                            |  |
| <i>Null</i>    | 537       | 91  | 0.95 (0.74 to 1.24) | 60  | 0.98 (0.72 to 1.34) | 31  | 0.89 (0.58 to 1.34)                               | 50  | 1.06 (0.76 to 1.49)                            |  |

\*ORs adjusted for age, sex, race/ethnicity, *in utero* exposure to maternal smoking, number of smokers at home, community of

residence, parental education, health insurance, and parental history of asthma.

† Data on *GSTM1* and *GSTT1* were unavailable for 140 children.

TABLE E7. Association between EPHX1 phenotypes and asthma among lifelong residents, stratified by *GSTP1 Ile105Val* genotype.

| EPHX1 phenotypes by asthma status | Residential distance from major road |                          |      |                             | <i>P</i> <sup>‡</sup> |
|-----------------------------------|--------------------------------------|--------------------------|------|-----------------------------|-----------------------|
|                                   | ≥75m                                 |                          | <75m |                             |                       |
|                                   | N*                                   | OR <sup>†</sup> (95% CI) | N*   | OR <sup>†</sup> (95% CI)    |                       |
| <b>No asthma</b>                  |                                      |                          |      |                             |                       |
| Low/intermediate                  | 1511                                 |                          | 362  |                             |                       |
| High                              | 338                                  |                          | 65   |                             |                       |
| <b>Ever asthma</b>                |                                      |                          |      |                             |                       |
| Low/intermediate                  | 152                                  | 1.0                      | 28   | 1.0                         |                       |
| High                              | 40                                   | 1.15 (0.78 to 1.69)      | 16   | <b>4.16 (1.84 to 9.42)</b>  | <b>0.009</b>          |
| <b>Current asthma</b>             |                                      |                          |      |                             |                       |
| Low/intermediate                  | 105                                  | 1.0                      | 20   | 1.0                         |                       |
| High                              | 27                                   | 1.16 (0.73 to 1.85)      | 11   | <b>3.94 (1.52 to 10.23)</b> | <b>0.03</b>           |
| <b>Early persistent asthma</b>    |                                      |                          |      |                             |                       |
| Low/intermediate                  | 41                                   | 1.0                      | 7    | 1.0                         |                       |
| High                              | 10                                   | 1.05 (0.50 to 2.20)      | 3    | 6.80 (0.76 to 60.78)        | 0.35                  |
| <b>Late onset asthma</b>          |                                      |                          |      |                             |                       |
| Low/intermediate                  | 96                                   | 1.0                      | 19   | 1.0                         |                       |
| High                              | 26                                   | 1.23 (0.77 to 1.97)      | 13   | <b>5.73 (2.25 to 14.57)</b> | <b>0.006</b>          |

\* Children with missing data on residential distance from major road were excluded.

† ORs represent odds ratios for asthma outcomes associated with high EPHX1 phenotype within each stratum of residential distance from major road, and were adjusted for age, sex, race/ethnicity, in utero exposure to maternal smoking, number of smokers at home, community of residence, parental education, health insurance, and parental history of asthma.

‡ The *P* value for the *EPHX1* metabolic phenotypes by residential distance from major road interactions were obtained from likelihood ratio tests from a non-stratified model with appropriate interaction terms and was based on 1 df.

TABLE E8. Association between EPHX1 phenotypes and asthma among lifelong residents, stratified by residential distance from major roads (n = 2483).

| Residential distance from major road | <i>GSTP1</i> Ile105Val | <i>EPHX1</i> phenotypes | No asthma (N*) | Lifetime asthma (N*) | OR <sup>†</sup> (95% CI)     |
|--------------------------------------|------------------------|-------------------------|----------------|----------------------|------------------------------|
| ≥75m                                 | <i>Ile/Ile</i>         | Low/Intermediate        | 582            | 60                   | 1.0                          |
| ≥75m                                 | <i>Ile/Val</i>         | Low/Intermediate        | 702            | 73                   | 1.03 (0.71 to 1.50)          |
| ≥75m                                 | <i>Val/Val</i>         | Low/Intermediate        | 211            | 18                   | 0.89 (0.50 to 1.58)          |
| ≥75m                                 | <i>Ile/Ile</i>         | High                    | 139            | 15                   | 1.03 (0.55 to 1.92)          |
| ≥75m                                 | <i>Ile/Val</i>         | High                    | 157            | 15                   | 0.96 (0.50 to 1.72)          |
| ≥75m                                 | <i>Val/Val</i>         | High                    | 36             | 8                    | <b>2.57 (1.10 to 6.00)</b>   |
| <75m                                 | <i>Ile/Ile</i>         | Low/Intermediate        | 141            | 11                   | 0.74 (0.37 to 1.47)          |
| <75m                                 | <i>Ile/Val</i>         | Low/Intermediate        | 169            | 14                   | 0.68 (0.36 to 1.30)          |
| <75m                                 | <i>Val/Val</i>         | Low/Intermediate        | 48             | 3                    | 0.63 (0.18 to 2.17)          |
| <75m                                 | <i>Ile/Ile</i>         | High                    | 31             | 6                    | 1.77 (0.67 to 4.67)          |
| <75m                                 | <i>Ile/Val</i>         | High                    | 29             | 7                    | <b>2.67 (1.06 to 6.73)</b>   |
| <75m                                 | <i>Val/Val</i>         | High                    | 5              | 3                    | <b>5.50 (1.05 to 28.72)</b>  |
|                                      |                        |                         |                |                      | <i>P</i> <sup>‡</sup> = 0.08 |

\* Children with missing data on residential distance from major road and *GSTP1* Ile105Val were excluded.

† ORs adjusted for age, sex, race/ethnicity, *in utero* exposure to maternal smoking, number of smokers at home, community of residence, parental education, health insurance, and parental history of asthma.

‡ The P value for the *EPHX1* activity phenotype by residential distance from a major road and by *GSTP1* Ile105Val genotype interaction was obtained from likelihood ratio test from a non-stratified model with appropriate interaction terms and was based on 7df.

TABLE E9. Comparison between children who provided buccal samples and those who did not participate in the genetic study.

|                                                     | Participants<br>(N =3,153) |        | Non-participants<br>(N = 1,840) |                     | P-value <sup>†</sup> |
|-----------------------------------------------------|----------------------------|--------|---------------------------------|---------------------|----------------------|
|                                                     | N*                         | (%)    | N*                              | (%)                 |                      |
| <b>Sex</b>                                          |                            |        |                                 |                     |                      |
| Girls                                               | 1688                       | (53.5) | 886                             | (48.2)              | 0.0002               |
| Boys                                                | 1465                       | (46.5) | 954                             | (51.8)              |                      |
| <b>Age (years)</b>                                  |                            |        |                                 |                     |                      |
| ≤ 10                                                | 1730                       | (54.9) | 718                             | (39.0)              | <0.0001              |
| 11-12                                               | 593                        | (18.8) | 382                             | (20.8)              |                      |
| > 12                                                | 830                        | (26.3) | 740                             | (40.2)              |                      |
| <b>Ethnicity</b>                                    |                            |        |                                 |                     |                      |
| Non-Hispanic white                                  | 2172                       | (68.9) | 1137                            | (61.8)              | <0.0001              |
| Hispanic white                                      | 981                        | (31.1) | 703                             | (38.2)              |                      |
| <b>Annual family income (\$)</b>                    |                            |        |                                 |                     |                      |
| < \$15,500                                          | 372                        | (13.7) | 346                             | (23.1)              | <0.0001              |
| \$15,000 - \$49,999                                 | 1144                       | (42.0) | 658                             | (44.0)              |                      |
| ≥\$50,000                                           | 1205                       | (44.3) | 492                             | (32.9)              |                      |
| <b>Parent/guardian education</b>                    |                            |        |                                 |                     |                      |
| < 12 <sup>th</sup> grade                            | 362                        | (11.8) | 362                             | (20.3)              | <0.0001              |
| 12 <sup>th</sup> grade                              | 595                        | (19.4) | 424                             | (23.7)              |                      |
| Some college                                        | 1404                       | (45.7) | 732                             | (41.0)              |                      |
| College                                             | 314                        | (10.2) | 121                             | (6.8)               |                      |
| Some graduate                                       | 397                        | (12.9) | 146                             | (8.2)               |                      |
| <b>Health insurance coverage</b>                    |                            |        |                                 |                     |                      |
| No                                                  | 444                        | (14.3) | 338                             | (18.9) <sup>†</sup> | <0.0001              |
| Yes                                                 | 2660                       | (85.7) | 1453                            | (81.1)              |                      |
| <b>Exposure to maternal smoking <i>in utero</i></b> |                            |        |                                 |                     |                      |
| No                                                  | 2553                       | (82.6) | 1366                            | (76.9)              | <0.0001              |
| Yes                                                 | 537                        | (17.4) | 411                             | (23.1)              |                      |
| <b>Number of smokers at home</b>                    |                            |        |                                 |                     |                      |
| None                                                | 2153                       | (70.6) | 1035                            | (58.9)              | <0.0001              |
| 1                                                   | 598                        | (19.6) | 458                             | (26.1)              |                      |
| 2 or more                                           | 298                        | (9.8)  | 264                             | (15.0)              |                      |
| <b>Residential distance from a freeway</b>          |                            |        |                                 |                     |                      |
| >1500m                                              | 1580                       | (58.6) | 806                             | (52.8)              | 0.001                |
| 1001-1500m                                          | 351                        | (13.0) | 236                             | (15.5)              |                      |
| 500-1000m                                           | 437                        | (16.2) | 259                             | (17.0)              |                      |
| <500m                                               | 327                        | (12.1) | 226                             | (14.8)              |                      |
| <b>Asthma</b>                                       |                            |        |                                 |                     |                      |
| Never                                               | 2726                       | (86.5) | 1632                            | (88.7)              | 0.02                 |
| Ever                                                | 427                        | (13.5) | 208                             | (11.3)              |                      |

\*Numbers always do not add up because of missing data

<sup>†</sup>*P* values are from Pearson chi-square tests). Comparisons were restricted to non-Hispanic and Hispanic white children. Children who had early transient asthma and those with unknown asthma status have been excluded from these comparisons to reflect the population studied.



TABLE E10. Percentage of Hispanic white children in the present study and at study enrollment by communities.

| Community      | Percentage of Hispanic white within each community |                     |
|----------------|----------------------------------------------------|---------------------|
|                | Present study                                      | At study enrollment |
|                | (%)                                                | (%)                 |
| Alpine         | (13.5)                                             | (17.5)              |
| Lake Elsinore  | (31.2)                                             | (30.5)              |
| Lake Arrowhead | (17.5)                                             | (18.5)              |
| Lancaster      | (33.1)                                             | (34.5)              |
| Lompoc         | (27.9)                                             | (30.9)              |
| Long Beach     | (32.5)                                             | (39.5)              |
| Miraloma       | (42.3)                                             | (43.1)              |
| Riverside      | (44.7)                                             | (52.3)              |
| San Dimas      | (35.5)                                             | (38.1)              |
| Atascadero     | (13.0)                                             | (15.8)              |
| Santa Maria    | (68.3)                                             | (70.6)              |
| Upland         | (19.0)                                             | (18.8)              |

\* Column percent

## REFERENCES:

- 1 Peters JM, Avol E, Navidi W, *et al.* A study of twelve Southern California communities with differing levels and types of air pollution. I. Prevalence of respiratory morbidity. *Am J Respir Crit Care Med* 1999;**159**:760-7.
- 2 Peters JM, Avol E, Gauderman WJ, *et al.* A study of twelve Southern California communities with differing levels and types of air pollution. II. Effects on pulmonary function. *Am J Respir Crit Care Med* 1999;**159**:768-75.
- 3 To-Figueras J, Gene M, Gomez-Catalan J, *et al.* Lung cancer susceptibility in relation to combined polymorphisms of microsomal epoxide hydrolase and glutathione S-transferase P1. *Cancer Lett* 2001;**173**:155-62.
- 4 Zhou W, Liu G, Thurston SW, *et al.* Genetic polymorphisms in N-acetyltransferase-2 and microsomal epoxide hydrolase, cumulative cigarette smoking, and lung cancer. *Cancer Epidemiol Biomarkers Prev* 2002;**11**:15-21.
- 5 Benhamou S, Reinikainen M, Bouchardy C, *et al.* Association between lung cancer and microsomal epoxide hydrolase genotypes. *Cancer Res* 1998;**58**:5291-3.
